# Supplementary material for: Changes in the clinical presentation and outcomes of patients treated for severe malaria in a referral French university intensive care unit from 2004 to 2017
Source: Ann Intensive Care. 2020 Feb 12;10:21. doi: 10.1186/s13613-020-0634-4 (PMC7016155; doi:10.1186/s13613-020-0634-4)
Supplement: Supplementary file 1 — Additional file 1. Additional table. [file 13613_2020_634_MOESM1_ESM.docx]

**Additional file**

**Changes in the clinical presentation and outcomes of patients treated for severe malaria in a referral French university intensive care unit from 2004 to 2017.**

**Authors:**

Lebut Jordane1,4 MD, Mourvillier Bruno1,5 MD, Argy Nicolas2, Dupuis Claire1,3 MD, PhD, Vinclair Camille1 MD, Radjou Aguila1 MD, de Montmollin Etienne1,3 MD, Sinah Fabrice1 MD, Patrier Juliette1 MD, Le Bihan Clément1,3 MD, Magalahes Eric1 MD, Smonig Roland1 MD , Kendjo Eric5, Thellier Marc5 , Ruckly Stéphane6 MSc, Bouadma Lila1,3 MD, PhD, Wolff Michel1,3 MD, PhD, Sonneville Romain1,3 MD, PhD, Houzé Sandrine2, Timsit Jean-François1,3,6 MD, PhD

**Changes in the clinical presentation and outcomes of patients treated for severe malaria in a referral French intensive care unit in a university hospital from 2004 to 2017**

| Table E1. Severe malaria review |  |  |  |  |  |  |  |  |  |  |
| --- | --- | --- | --- | --- | --- | --- | --- | --- | --- | --- |
| **Study title** | **Year** | **Date** | **Nb of patients** | **Treatment** | **Mortality (%)** | **MV (%)** | **Vasopressors (%)** | **RRT (%)** | **ICU LOS (IQR)** | **Hospital LOS (IQR)** |
| Severe Imported Falciparum Malaria: a cohort study in 400 critically ill adults (10) | 2010 | 2000-2006 | 400 | Quinine | 42 (10) | 116 (29) | 109 (27) | 81 (20 | 5 (3-8) | 10 (7-17) |
| Treatment outcome of intravenous artesunate in patients with severe malaria in the Netherlands and Belgium (17) | 2012 | 2007-2010 | 55 | Artesunate | 2 (3.6) | 6 (9) | 6 (9) | 5 (7) | 2 | 4.5 |
| Severe imported falciparum malaria among adults requiring intensive care: a retrospective study at the hospital for tropical diseases, London (12) | 2013 | 1994-2010 | 124 | Q / AS | 5 (4) | 46 (37) | 43 (35) | 43 (35) | 10 (7-19) | . |
| Imported falciparum malaria in adults: host- and parasite related factors associated with severity, The French prospective multicenter PALUREA cohort study (11) | 2016 | 2006-2010 | 155 | Quinine | 8 (5.2) | 42 (27) | 39 (25) | 26 (17) | 7.1 (mean) | 13.3 (mean) |
| Severe plasmodium falciparum malaria in the intensive care unit: a 6-year experience in Milano, Italy (16) | 2017 | 2010-2015 | 12 | Quinine | 0 (0) | 5 (42) | 4 (33) | 4 (33) | 5 | 11.5 |
| Severe malaria in Europe: a 8-year multicenter observational study (24) | 2017 | 2006-2014 | 185 | Q / AS | 3 (1.6) | 18 (10) | 24 (13) | 20 (11) | 3 vs 2 | 7 vs 6 |
| Present study. | 2019 | 2004-2017 | 189 | Q/AS | 7 (3.7) | 34 (18) | 19 (10) | 35 (19) | 2 (2-4) | 7 (5-13) |

MV: invasive mechanical ventilation; RRT: Renal replacement therapy; Q / AS: quinine/artesunate without distinctions ([31](#_ENREF_31))
